# Supplementary material for: Functional subdivision of the human periaqueductal grey in respiratory control using 7 tesla fMRI
Source: PubMed Central journal article supplement (PMC4441042; doi:10.1016/j.neuroimage.2015.02.026), 2015-06
Supplement: mmc1.pdf [file mmc1.pdf]

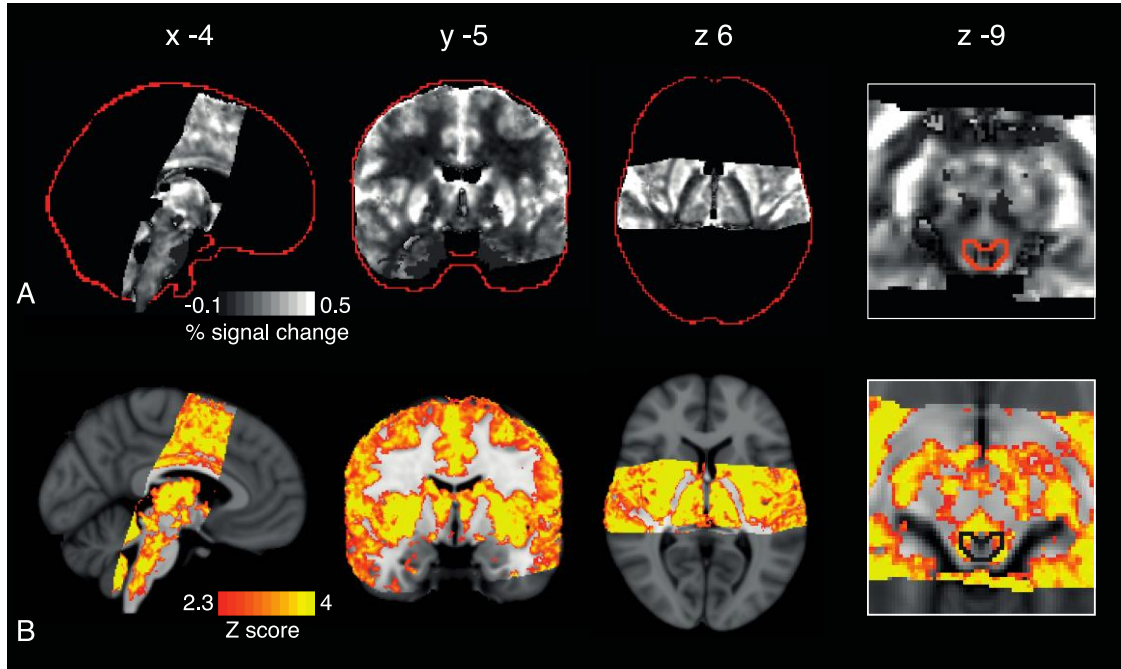

Supplementary Figure 1. A. Global BOLD signal change correlating with changes in end tidal carbon dioxide ( $P_{ET}CO_2$ ). The red lines indicate the edges of the the brain, derived from the MNI ( $1mm^3$ ) standard brain. Image on the right is a zoom to show signal changes within the PAG (outlined in red). B. Statistically significant generalised grey matter signal increases as a result of hypercapnia. PAG outlined in black on the far right. A carbon dioxide ( $CO_2$ ) trace was created by extrapolating between end-tidal  $CO_2$  peaks, and small hypercapnic challenges were administered during rest periods to dissociate hypercapnic effects from respiratory challenges. The images consist of a colour-rendered statistical map superimposed on a standard (MNI  $1mm^3$ ) brain. Significant regions are displayed with a threshold  $Z > 2.3$ , with a cluster probability threshold of  $p < 0.05$  (corrected for multiple comparisons).

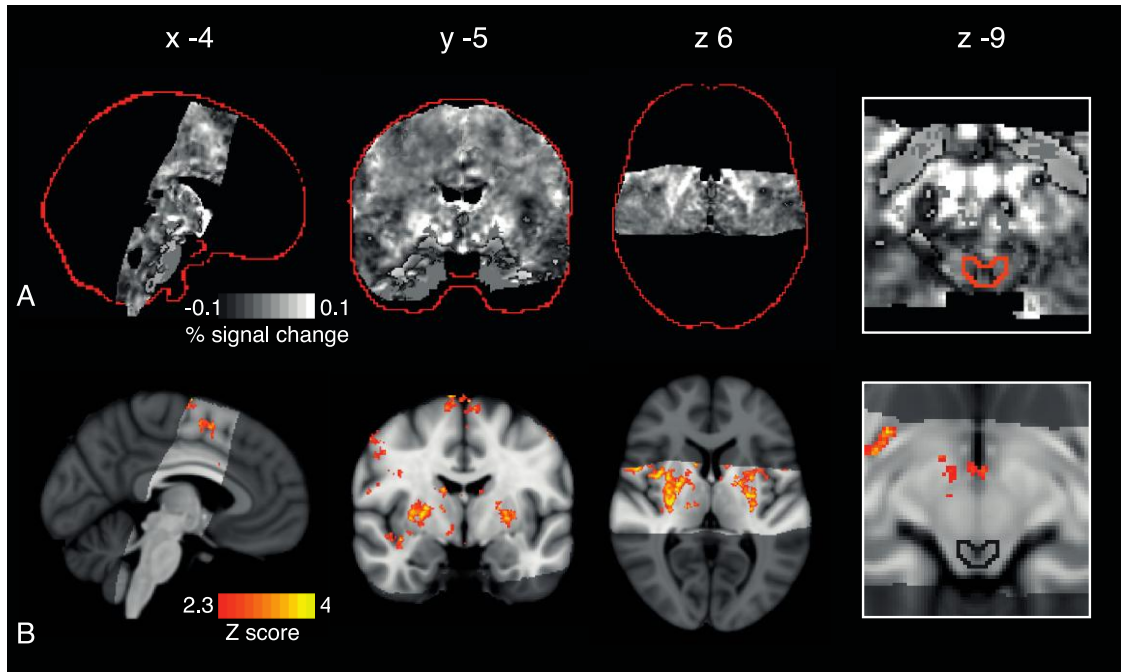

Supplementary Figure 2. A. Global BOLD signal change correlating with breath holds. The red lines indicate the edges of the brain, derived from the MNI (1mm<sup>3</sup>) standard brain. Image on the right is a zoom to show signal changes within the PAG (outlined in red). B. Statistically significant signal increases as a result of breath holds. PAG outlined in black on the far right. The images consist of a colour-rendered statistical map superimposed on a standard (MNI 1mm<sup>3</sup>) brain. Significant regions are displayed with a threshold  $Z > 2.3$ , with a cluster probability threshold of  $p < 0.05$  (corrected for multiple comparisons).

| Locations of signal maxima in response to breath hold regressor |      |     |     |             |       |     |     |             |
|-----------------------------------------------------------------|------|-----|-----|-------------|-------|-----|-----|-------------|
| Region                                                          | left |     |     |             | right |     |     |             |
|                                                                 | x    | y   | z   | max Z score | x     | y   | z   | max Z score |
| <i>Activations</i>                                              |      |     |     |             |       |     |     |             |
| Motor cortex                                                    | -59  | 4   | 20  | 4.64        | 51    | 9   | 22  | 5.34        |
| Motor cortex                                                    | -43  | -15 | 43  | 4.28        | 44    | -13 | 40  | 4.20        |
| Putamen                                                         | -20  | -2  | 5   | 4.79        | 29    | -14 | 2   | 4.83        |
| Anterior Insula                                                 | -40  | 5   | 1   | 3.27        | 40    | 6   | 2   | 4.57        |
| Cingulate cortex                                                | -1   | 14  | 30  | 3.00        | 3     | 13  | 29  | 3.38        |
| Paracingulate cortex                                            | -4   | 8   | 48  | 3.03        | 7     | 8   | 45  | 5.02        |
| Supramarginal gyrus                                             | -59  | -24 | 26  | 3.54        | 63    | -22 | 26  | 4.89        |
| Sensory cortex                                                  | -42  | -17 | 43  | 4.55        | 43    | -11 | 36  | 4.27        |
| Supplementary MC                                                | -5   | 6   | 54  | 3.82        | 3     | 7   | 64  | 4.30        |
| Caudate nucleus                                                 | -17  | -16 | 20  | 3.92        | 15    | -9  | 20  | 3.77        |
| Thalamus                                                        |      |     |     |             | 11    | -16 | 4   | 3.82        |
| Thalamus                                                        |      |     |     |             | 9     | -14 | 11  | 4.11        |
| Subthalamic nucleus                                             |      |     |     |             | 8     | -11 | -7  | 3.45        |
| Red nucleus                                                     |      |     |     |             | 6     | -19 | -4  | 3.26        |
| <i>Deactivations</i>                                            |      |     |     |             |       |     |     |             |
| PAG, lateral*                                                   |      |     |     |             | 3     | -33 | -11 | P=0.032     |
| PAG, dorsomedial*                                               |      |     |     |             | 2     | -37 | -10 | P=0.014     |
| Middle Insula                                                   | -39  | -6  | 13  | 3.97        | 39    | -3  | 5   | 3.90        |
| Hippocampus                                                     | -32  | -20 | -15 | 3.70        | 30    | -13 | -15 | 4.14        |
| Parahippocampal gyrus                                           | -26  | -35 | -15 | 3.43        | 27    | -32 | -16 | 3.87        |
| Amygdala                                                        | 22   | -7  | -11 | 4.25        | -26   | -6  | -20 | 3.72        |
| Pons                                                            | -5   | -26 | -27 | 3.80        |       |     |     |             |
| Pons                                                            | -4   | -37 | -36 | 3.35        |       |     |     |             |

|            |  |  |  |  |   |     |     |      |
|------------|--|--|--|--|---|-----|-----|------|
| Cerebellum |  |  |  |  | 2 | -51 | -46 | 4.31 |
|------------|--|--|--|--|---|-----|-----|------|

Supplementary Table 1. Co-ordinates of local maxima of significant increases (activations) and decreases (deactivations) in the BOLD response to breath holding. Values derived from cluster-based analysis. The most significant maximum is listed for each anatomical location. Co-ordinates are in mm in standard space of MNI (1mm<sup>3</sup>). x, distance right (+) or left (-) of the mid saggital line; y, distance anterior (+) or posterior (-) from a vertical plane through the anterior commissure; z, distance above (+) or below(-) the intercommisural plane. Abbreviations: MC, motor cortex; PAG, periaqueductal gray. \*PAG analysis was conducted using threshold free cluster enhancement, corrected for multiple comparisons within the PAG, producing P values representing cluster-like local support.
